## SUPPLEMENTARY DATA

Table S1. Location data, OTU, and germination results for isolates used in this current study. N, the total number of subcultures tested in this study.

| Orchid/Isolate Species       | Isolate | OTU | Genbank Accession | Location          | Site Name        | Latitude      | Longitude      | Germination | N | Reference                      |
|------------------------------|---------|-----|-------------------|-------------------|------------------|---------------|----------------|-------------|---|--------------------------------|
| <i>Caladenia arenicola</i>   | -       | 5   | HM241759          | Western Australia | Ken Hurst        | S32°04'43.87" | E115°52'59.62" | -           | - | Swarts et al. (2010)           |
| <i>Caladenia atroclavia</i>  | -       | 6   | FJ611955          | Queensland        | Wyberba          | S28°52'       | E151°52'       | -           | - | Dearnaley, unpublished data    |
| <i>Caladenia audasii</i>     | -       | 6   | GQ996354          | Victoria          | Bendigo          | S36°46'07.72" | E144°15'20.66" | -           | - | Wright et al. (2010)           |
| <i>Caladenia audasii</i>     | -       | 6   | GQ996355          | Victoria          | Bendigo          | S36°46'07.72" | E144°15'20.66" | -           | - | Wright et al. (2010)           |
| <i>Caladenia carnea</i>      | -       | 3   | AY643802          | Queensland        | Helidon Hills    | S27°26'       | E152°09'       | -           | - | Bougoure et al. (2005)         |
| <i>Caladenia catenata</i>    | -       | 2   | DQ983814          | Australia         | -                | -             | -              | -           | - | Deshmukh et al. (2006)         |
| <i>Caladenia dilatata</i>    | -       | 4   | DQ983815          | Australia         | -                | -             | -              | -           | - | Deshmukh et al. (2006)         |
| <i>Caladenia flava</i>       | -       | 3   | HM241760          | Western Australia | Ken Hurst        | S32°04'43.87" | E115°52'59.62" | -           | - | Swarts et al. (2010)           |
| <i>Caladenia flava</i>       | -       | 4   | JX138545          | Western Australia | Dale River       | S32°17'       | E116°33'       | -           | - | Sommer et al. (2012)           |
| <i>Caladenia flava</i>       | -       | 3   | JX138546          | Western Australia | Warwick Bushland | S31°50'3.3"   | E115°49'6.7"   | -           | - | Sommer et al. (2012)           |
| <i>Caladenia flava</i>       | -       | 2   | JX138547          | Western Australia | Warwick          | S31°50'3.3"   | E115°49'6.7"   | -           | - | Sommer et al. (2012)           |
| <i>Caladenia formosa</i>     | -       | 6   | EF063699          | Victoria          | -                | -             | -              | -           | - | Osborn et al, unpublished data |
| <i>Caladenia formosa</i>     | -       | 6   | EF063701          | Victoria          | -                | -             | -              | -           | - | Osborn et al, unpublished data |
| <i>Caladenia huegelii</i>    | -       | 6   | HM241748          | Western Australia | Kooljerrenu p    | S32°47'29.12" | E115°43'48.71" | -           | - | Swarts et al. (2010)           |
| <i>Caladenia huegelii</i>    | -       | 6   | HM241749          | Western Australia | Fraser           | S32°06'41.71" | E115°53'34.98" | -           | - | Swarts et al. (2010)           |
| <i>Caladenia huegelii</i>    | -       | 6   | HM241750          | Western Australia | Fraser           | S32°06'41.71" | E115°53'34.98" | -           | - | Swarts et al. (2010)           |
| <i>Caladenia huegelii</i>    | -       | 6   | HM241756          | Western Australia | Wandi            | S32°12'14.58" | E115°54'19.60" | -           | - | Swarts et al. (2010)           |
| <i>Caladenia longicauda</i>  | -       | 1   | HM241758          | Western Australia | Ken Hurst        | S32°04'43.87" | E115°52'59.62" | -           | - | Swarts et al. (2010)           |
| <i>Caladenia longicauda</i>  | -       | OG  | JX138551          | Western Australia | Mininup NR       | S34°07'13.2"  | E116°49'38.2"  | -           | - | Sommer et al. (2012)           |
| <i>Caladenia marginata</i>   | -       | 3   | JX138554          | Western Australia | Yornup           | S34°06'20.7"  | E116°11'59.8"  | -           | - | Sommer et al. (2012)           |
| <i>Caladenia pattersonii</i> | -       | 6   | GQ996361          | Victoria          | Inverleigh       | S36°03'06.26" | E144°01'39.06" | -           | - | Wright et al. (2010)           |
| <i>Caladenia pattersonii</i> | -       | 6   | GQ996362          | Victoria          | Inverleigh       | S36°03'06.26" | E144°01'39.06" | -           | - | Wright et al. (2010)           |
| <i>Caladenia rosella</i>     | -       | 6   | GQ996358          | Victoria          | Cottles Bridge   | S37°37'22.90" | E145°13'03.71" | -           | - | Wright et al. (2010)           |
| <i>Caladenia serotina</i>    | -       | 5   | JX138555          | Western Australia | Yornup           | S34°06'19.9"  | E116°11'57.8"  | -           | - | Sommer et al. (2012)           |

|                                 |    |    |          |                   |               |               |                |      |    |                        |
|---------------------------------|----|----|----------|-------------------|---------------|---------------|----------------|------|----|------------------------|
| <i>Caladenia tentaculata</i>    | -  | 4  | EF470248 | Victoria          | -             | -             | -              | -    | -  | Wright (2007)          |
| <i>Caladenia tentaculata</i>    | -  | 4  | EF470249 | Victoria          | -             | -             | -              | -    | -  | Wright (2007)          |
| <i>Caladenia tentaculata</i>    | -  | 4  | EU526279 | Victoria          | -             | -             | -              | -    | -  | Wright (2007)          |
| <i>Caladenia tentaculata</i>    | -  | 4  | EU526280 | Victoria          | -             | -             | -              | -    | -  | Wright (2007)          |
| <i>Caladenia tentaculata</i>    | -  | OG | EU526281 | Victoria          | -             | -             | -              | -    | -  | Wright (2007)          |
| <i>Caladenia tentaculata</i>    | -  | 4  | EU526282 | Victoria          | -             | -             | -              | -    | -  | Wright (2007)          |
| <i>Caladenia tentaculata</i>    | -  | 6  | GQ996339 | Victoria          | Maldon        | S36°59'51.02" | E144°04'01.99" | -    | -  | Wright et al. (2010)   |
| <i>Caladenia tentaculata</i>    | -  | 6  | GQ996340 | Victoria          | Maldon        | S36°59'51.02" | E144°04'01.99" | -    | -  | Wright et al. (2010)   |
| <i>Caladenia tentaculata</i>    | -  | 6  | GQ996341 | Victoria          | Maldon        | S36°59'51.02" | E144°04'01.99" | -    | -  | Wright et al. (2010)   |
| <i>Caladenia tentaculata</i>    | -  | 6  | GQ996342 | Victoria          | Maldon        | S36°59'51.02" | E144°04'01.99" | -    | -  | Wright et al. (2010)   |
| <i>Caladenia tentaculata</i>    | -  | 4  | GQ996344 | Victoria          | Maldon        | S36°59'51.02" | E144°04'01.99" | -    | -  | Wright et al. (2010)   |
| <i>Caladenia tentaculata</i>    | -  | 6  | GQ996345 | Victoria          | Maldon        | S36°59'51.02" | E144°04'01.99" | -    | -  | Wright et al. (2010)   |
| <i>Caladenia tentaculata</i>    | -  | 2? | GQ996346 | Victoria          | Chewton       | S37°04'33.24" | E144°16'37.06" | -    | -  | Wright et al. (2010)   |
| <i>Caladenia tentaculata</i>    | -  | 4  | GQ996347 | Victoria          | Chewton       | S37°04'33.24" | E144°16'37.06" | -    | -  | Wright et al. (2010)   |
| <i>Caladenia tentaculata</i>    | -  | 4  | GQ996348 | Victoria          | Eltham        | S37°43'27.29" | E145°08'43.89" | -    | -  | Wright et al. (2010)   |
| <i>Caladenia tentaculata</i>    | -  | 4  | GQ996349 | Victoria          | Eltham        | S37°43'27.29" | E145°08'43.89" | -    | -  | Wright et al. (2010)   |
| <i>Caladenia tentaculata</i>    | -  | 2  | GQ996352 | Victoria          | Wonthaggi     | S38°38'39.12" | E145°33'56.53" | -    | -  | Wright et al. (2010)   |
| <i>Caladenia tessellata</i>     | -  | 6  | DQ983816 | Australia         | -             | -             | -              | -    | -  | Deshmukh et al. (2006) |
| <i>Elythranthera brunonis</i>   | -  | 3  | JX138544 | Western Australia | Dale River    | S32°17'       | E116°33'       | -    | -  | Sommer et al. (2012)   |
| <i>Elythranthera emarginata</i> | -  | 3  | JX138550 | Western Australia | Tone Bridge   | S34°05'57.2"  | E116°49'53.8"  | -    | -  | Sommer et al. (2012)   |
| <i>Pheladenia deformis</i>      | 3a | 1  | 25       | Western Australia | Lochada Rd    | S29°15'09.64" | E116°22'06.41" | 3(2) | 6  | present study          |
| <i>Pheladenia deformis</i>      | 2b | 1  | 30       | Western Australia | Lochada Rd    | S29°15'08.08" | E116°22'05.93" | 0(0) | 2  | present study          |
| <i>Pheladenia deformis</i>      | 2a | 1  | 32       | Western Australia | Lochada Rd    | S29°15'08.08" | E116°22'05.93" | 0(0) | 2  | present study          |
| <i>Pheladenia deformis</i>      | 6a | 1  | 39       | Western Australia | Zig Zag       | S31°55'58.38" | E116°03'26.24" | 5(3) | 3  | present study          |
| <i>Pheladenia deformis</i>      | 3e | 1  | 56       | Victoria          | Little Desert | S36°25'39.20" | E142°44'56.80" | 0(0) | 3  | present study          |
| <i>Pheladenia deformis</i>      | 3d | 1  | 59       | Victoria          | Dalyenong     | S36°47'01.12" | E143°24'28.08" | 0(0) | 3  | present study          |
| <i>Pheladenia deformis</i>      | 3f | 1  | 60       | Victoria          | Little Desert | S36°25'39.20" | E142°44'56.80" | 0(0) | 2  | present study          |
| <i>Pheladenia deformis</i>      | 4d | 1  | 64       | Victoria          | Germania      | S36°58'18.86" | E142°44'54.05" | 5(2) | 2  | present study          |
| <i>Pheladenia deformis</i>      | 3b | 1  | 69       | Victoria          | Dalyenong     | S36°47'01.12" | E143°24'28.08" | 5(3) | 3  | present study          |
| <i>Pheladenia deformis</i>      | 1d | 1  | 70       | Victoria          | Dalyenong     | S36°47'00.36" | E145°24'25.71" | 0(0) | 3  | present study          |
| <i>Pheladenia deformis</i>      | 5b | 1  | 74       | Western Australia | Mundaring     | S32°00'52.56" | E116°20'28.97" | 4(2) | 2  | present study          |
| <i>Pheladenia deformis</i>      | 6b | 1  | 75       | Western Australia | Mt Ridley     | S33°17'20.42" | E122°07'31.07" | 4(3) | 3  | present study          |
| <i>Pheladenia deformis</i>      | 2b | 1  | 77       | Western Australia | Mt Ridley     | S33°17'21.87" | E122°07'31.38" | NA   | NA | present study          |
| <i>Pheladenia deformis</i>      | 2a | 1  | 78       | Western Australia | Mt Ridley     | S33°17'21.87" | E122°07'31.38" | 5(3) | 3  | present study          |
| <i>Pheladenia deformis</i>      | 4b | 1  | 79       | Western Australia | Mt Ridley     | S33°17'20.68" | E122°07'31.85" | NA   | NA | present study          |
| <i>Pheladenia deformis</i>      | 2c | 4  | 86       | Western Australia | Mundaring     | S32°00'53.00" | E116°20'29.49" | 3(2) | 3  | present study          |
| <i>Pheladenia deformis</i>      | 3a | 1  | 88       | Western Australia | Wongan        | S30°52'40.09" | E116°42'26.07" | 0(0) | 3  | present study          |

|                             |    |    |          |                   | Hills                   |                |                 |      |    |                                    |
|-----------------------------|----|----|----------|-------------------|-------------------------|----------------|-----------------|------|----|------------------------------------|
| <i>Pheladenia deformis</i>  | 2c | 1  | 91       | Western Australia | Dryandra                | S32° 45'43.33" | E116° 57'45.36" | 0(0) | 3  | present study                      |
| <i>Pheladenia deformis</i>  | 2b | 4  | 92       | Western Australia | Mundaring               | S32° 00'53.00" | E116° 20'29.49" | 4(3) | 3  | present study                      |
| <i>Pheladenia deformis</i>  | 2a | 4  | 93       | Western Australia | Mundaring               | S32° 00'53.00" | E116° 20'29.49" | 3(3) | 3  | present study                      |
| <i>Pheladenia deformis</i>  | 4c | 1  | 94       | Western Australia | Mundaring               | S32° 00'52.47" | E116° 20'30.07" | 3(2) | 3  | present study                      |
| <i>Pheladenia deformis</i>  | 4b | 1  | 95       | Western Australia | Mundaring               | S32° 00'52.47" | E116° 20'30.07" | 3(1) | 3  | present study                      |
| <i>Pheladenia deformis</i>  | 4a | 1  | 98       | Victoria          | Little Desert           | S36° 25'39.70" | E141° 45'15.32" | 5(3) | 3  | present study                      |
| <i>Pheladenia deformis</i>  | 1f | 1  | 101      | Victoria          | Inverleigh              | S36° 03'04.17" | E144° 01'37.62" | 0(0) | 2  | present study                      |
| <i>Pheladenia deformis</i>  | 1a | 1  | 103      | Victoria          | Little Desert           | S36° 25'41.10" | E141° 45'16.46" | 5(3) | 6  | present study                      |
| <i>Pheladenia deformis</i>  | 2c | 1  | 105      | Victoria          | Germania                | S36° 58'16.46" | E142° 44'53.83" | NA   | NA | present study                      |
| <i>Pheladenia deformis</i>  | 3b | 1  | 106      | Victoria          | Little Desert           | S36° 25'39.20" | E141° 45'17.01" | 0(0) | 2  | present study                      |
| <i>Pheladenia deformis</i>  | 1a | 1  | 111      | Victoria          | Germania                | S36° 58'17.20" | E142° 44'56.80" | 0(0) | 4  | present study                      |
| <i>Pheladenia deformis</i>  | 3c | 1  | 114      | Victoria          | Little Desert           | S36° 25'39.20" | E142° 44'56.80" | 0(0) | 3  | present study                      |
| <i>Pheladenia deformis</i>  | 1e | 1  | 115      | Victoria          | Little Desert           | S36° 25'41.10" | E141° 45'16.46" | NA   | NA | present study                      |
| <i>Pheladenia deformis</i>  | 2a | 1  | 116      | Victoria          | Inverleigh              | S36° 03'06.26" | E144° 01'39.06" | NA   | NA | present study                      |
| <i>Pheladenia deformis</i>  | 2e | 1  | 118      | Victoria          | Germania                | S36° 58'16.46" | E142° 44'53.83" | 5(3) | 3  | present study                      |
| <i>Pinus mycelia</i>        | -  | OG | EF619764 | USA               | -                       | -              | -               | -    | -  | Parrent & Vilgalys (2007)          |
| <i>Pinus taeda</i> root tip | -  | OG | AY296255 | unknown           | -                       | -              | -               | -    | -  | Walker & Parrent, unpublished data |
| <i>Sebacina allantoidea</i> | -  | OG | AF490396 | Germany           | -                       | -              | -               | -    | -  | Selosse et al. (2002)              |
| <i>Sebacina epigea</i>      | -  | OG | AF490397 | Germany           | -                       | -              | -               | -    | -  | Selosse et al. (2002)              |
| <i>Sebacina vermifera</i>   | -  | 4  | AF202728 | USA               | -                       | -              | -               | -    | -  | Taylor et al. unpublished data     |
| soil                        | -  | OG | DQ388872 | Queensland        | Peachester State Forest | S26° 50'       | E152° 53'       | -    | -  | Bastias et al. (2006)              |

**Bastias B, Xu Z, and Cairney J. 2006.** Influence of long-term repeated prescribed burning on a mycelial communities of ectomycorrhizal fungi. *New Phytologist* **172**: 149–158.

**Deshmukh S, Huckelhoven R, Schafer P, et. al. 2006.** The root endophytic fungus *Piriformis indica* requires host cell death for proliferation during mutualistic symbiosis with barley. *PNAS*, **103(49)**: 18450-18457.

**Parrent J, and Vilgalys R. 2007.** Biomass and compositional responses of ectomycorrhizal fungal hyphae to elevated CO<sub>2</sub> and nitrogen fertilization. *New Phytologist* **176**: 164–174.

- Selosse M, Weiss M, Jany J, and Tillier A. 2002.** Communities and populations of sebacinoid basidiomycetes associated with the achlorophyllous orchid *Neottia nidus-avis* (L.) L.C.M. Rich. and neighbouring tree ectomycorrhizae. *Molecular Ecology* **11(9)**: 1831-1844.
- Bougoure J, Bougoure D, Cairney J, and Dearnaley J. 2005.** ITS-RFLP and sequence analysis of endophytes from *Acianthus*, *Caladenia* and *Pterostylis* (Orchidaceae) in southeastern Queensland. *Mycological Research* **109**: 452-460.
- Sommer J, Pausch J, Brundrett M, Dixon K, Bidartondo M, and Gebauer G. 2012.** Limited carbon and mineral nutrient gain from mycorrhizal fungi by adult Australian orchids. *American Journal of Botany* **99(7)**: 1133-1145.
- Swarts N, Sinclair E, Francis A, and Dixon K. 2010.** Ecological specialisation in mycorrhizal symbiosis leads to rarity in an endangered orchid. *Molecular Ecology* **19**: 3226-3242.
- Wright M. 2007.** *Maximising the effectiveness of mycorrhizal fungi in the conservation of Caladenia taxa*. PhD thesis, The University of Melbourne.
- Wright M, Cross R, Cousens R, May T, and McLean C. 2010.** Taxonomic and functional characterisation of fungi from the *Sebacina vermifera* complex from common and rare orchids in the genus *Caladenia*. *Mycorrhiza* **20**: 375-390.
